# Supplementary material for: Pancancer analysis of the correlations of HS6ST2 with prognosis, tumor immunity, and drug resistance
Source: Sci Rep. 2023 Nov 6;13:19209. doi: 10.1038/s41598-023-46525-x (PMC10628205; doi:10.1038/s41598-023-46525-x)
Supplement: Supplementary file 1 — Supplementary Information 1. [file 41598_2023_46525_MOESM1_ESM.xlsx]

## Sheet: Sheet1
分组	样本编号	复孔	Actin	HS6ST2
Normal	sample1	1	37.168	32.301
Normal	sample1	2	37.637	32.074
Normal	sample1	3	35.723	32.723
Normal	sample2	1	37.168	33.051
Normal	sample2	2	36.637	32.668
Normal	sample2	3	37.723	32.613
Normal	sample3	1	35.381	32.268
Normal	sample3	2	35.274	31.637
Normal	sample3	3	35.823	31.623
Normal	sample4	1	36.168	32.751
Normal	sample4	2	36.737	31.368
Normal	sample4	3	36.723	31.773
NSCLC	sample1	1	34.732	26.892
NSCLC	sample1	2	33.582	26.851
NSCLC	sample1	3	33.465	27.27
NSCLC	sample2	1	33.457	26.863
NSCLC	sample2	2	33.16	26.723
NSCLC	sample2	3	33.395	26.949
NSCLC	sample3	1	33.832	27.695
NSCLC	sample3	2	34.382	26.051
NSCLC	sample3	3	34.735	26.27
NSCLC	sample4	1	33.557	27.763
NSCLC	sample4	2	34.76	27.728
NSCLC	sample4	3	34.395	27.749
