# Supplementary material for: Pancancer analysis of the correlations of HS6ST2 with prognosis, tumor immunity, and drug resistance
Source: Sci Rep. 2023 Nov 6;13:19209. doi: 10.1038/s41598-023-46525-x (PMC10628205; doi:10.1038/s41598-023-46525-x)
Supplement: Supplementary file 9 — Supplementary Tables. [file 41598_2023_46525_MOESM9_ESM.xlsx]

## Sheet: expression
Differential expression of HS6ST2 in pan-cancer
Cancer Type	TCGA database		TCGA+GTEx databases
	Normal mean	Tumor mean	Normal mean	Tumor mean
ACC	Not available	0.309953	0.283393	0.309953
BLCA	1.22006	1.74614	1.09038	1.74614
BRCA	1.02687	0.858022	0.542005	0.858022
CESC	1.37583	1.84382	0.676563	1.84382
CHOL	0.0523908	0.698291	0.0523908	0.698291
COAD	0.359305	1.76106	0.359305	1.76106
DLBC	Not available	0.0932646	Not available	0.0932646
ESCA	0.385555	1.3512	0.827214	1.3512
GBM	1.93522	1.48104	1.51398	1.48104
HNSC	1.50143	1.73886	1.50143	1.73886
KICH	3.21047	0.131244	1.90649	0.131244
KIRC	3.29204	0.133145	2.65071	0.133145
KIRP	3.15028	0.355025	2.11242	0.355025
LAML	Not available	0.0378496	0.0588908	0.0378496
LGG	Not available	1.70332	1.44069	1.70332
LIHC	0.0370315	0.332239	0.0426244	0.332239
LUAD	0.671654	2.90883	0.329482	2.90883
LUSC	0.669029	2.33892	0.302552	2.33892
MESO	Not available	0.469068	Not available	0.469068
OV	Not available	0.546413	2.28969	0.546413
PAAD	0.406016	0.464799	1.0751	0.464799
PCPG	0.48206	3.20601	0.290226	3.20601
PRAD	0.877798	0.756215	0.743327	0.756215
READ	0.494188	1.46372	0.494188	1.46372
SARC	1.38141	1.04298	1.38141	1.04298
SKCM	0.0861433	0.563243	0.102128	0.563243
STAD	0.783075	0.519829	0.616281	0.519829
TGCT	Not available	0.831621	0.965939	0.831621
THCA	0.362071	1.32097	0.161735	1.32097
THYM	0.26729	1.63349	0.26729	1.63349
UCEC	1.49317	0.970796	0.986016	0.970796
UCS	Not available	2.16581	0.954694	2.16581
UVM	Not available	0.169323	Not available	0.169323

## Sheet: DNA methylation  
Association between HS6ST2 expression and DNA methylation in pan-cancer
Cancer Type	DNA methylation
	Correlation	fdr
ACC	-0.173921	0.125297
BLCA	-0.404583	1.68264e-17
BRCA	-0.220567	6.80604e-09
CESC	-0.490457	8.35799e-20
CHOL	-0.625386	4.5381e-05
COAD	-0.645931	2.83171e-33
DLBC	-0.318172	0.0279803
ESCA	-0.73703	8.62671e-33
GBM	-0.27267	0.0531957
HNSC	-0.400019	2.11098e-21
KICH	-0.180771	0.146354
KIRC	-0.0105633	0.851164
KIRP	-0.266932	7.46926e-06
LAML	-0.19336	0.0115238
LGG	-0.149921	0.000642116
LIHC	-0.159154	0.0021064
LUAD	-0.439958	0
LUSC	-0.334178	5.18866e-11
MESO	-0.237025	0.0270741
OV	-0.466667	0.212522
PAAD	-0.289563	9.4607e-05
PRAD	-0.564326	0
READ	-0.62289	0
SARC	-0.399932	2.28909e-11
SKCM	-0.128512	0.00531565
STAD	-0.600339	8.49886e-38
TGCT	0.116029	0.157377
THCA	-0.334232	1.20691e-14
THYM	-0.324821	0.00031672
UCEC	-0.238433	0.00167771
UCS	-0.413534	0.00151433
UVM	-0.225859	0.0439607

## Sheet: RNA methylation 
Association between HS6ST2 expression and m6A, m5C, and m1A-related genes in pan-cancer
Cancer Type	RNA methylation
	TRMT10C		TRMT61B		YTHDF2		YTHDF3		YTHDC1		ALKBH3		NSUN2		NSUN3		NSUN4		NSUN5		NSUN7		DNMT3A		TET2
	Correlation	P-value	Correlation	P-value	Correlation	P-value	Correlation	P-value	Correlation	P-value	Correlation	P-value	Correlation	P-value	Correlation	P-value	Correlation	P-value	Correlation	P-value	Correlation	P-value	Correlation	P-value	Correlation	P-value
ACC	0.131552	0.247821	0.214796	0.0573055	0.0863365	0.449314	-0.127554	0.262612	-0.100388	0.378712	0.0546954	0.632114	0.251358	0.0254491	0.0766627	0.501888	0.176514	0.119677	-0.0284579	0.803393	0.0285575	0.802719	0.0436737	0.702331	0.0392966	0.730965
BLCA	0.233848	1.64293e-06	0.157915	0.00131875	0.197406	5.58793e-05	0.203634	3.19114e-05	0.332261	4.75074e-12	-0.107466	0.0293799	0.0468718	0.343198	0.223459	4.7762e-06	0.203929	3.10602e-05	-0.0298271	0.546521	0.163543	0.000875135	0.180844	0.000228211	0.249496	2.99252e-07
BRCA	0.0329749	0.273649	0.154147	2.65057e-07	0.0416031	0.167169	0.0636464	0.0344731	-0.0118252	0.694706	-0.0505296	0.0933291	0.0819196	0.00646145	0.02686	0.372601	0.025114	0.404487	-0.0735204	0.0145511	0.0393876	0.190963	0.101544	0.000727848	0.111112	0.000216342
CESC	0.149667	0.00873717	0.132679	0.0202486	0.167049	0.00338063	0.0748471	0.191633	0.150486	0.00837215	0.0947879	0.0979136	0.159081	0.00528425	0.0464537	0.418101	0.133792	0.0192138	-0.0468021	0.414616	-0.0378977	0.508956	-0.0760838	0.184376	0.102117	0.0744772
CHOL	0.0309103	0.85797	-0.0513277	0.766242	0.0372714	0.829135	0.0839132	0.626563	-0.00112114	0.994822	0.0606573	0.725271	0.153145	0.372544	-0.0329536	0.848686	0.283564	0.0937505	0.0855109	0.619987	0.222732	0.191653	0.0328284	0.849254	-0.0710054	0.680693
COAD	0.169546	0.000218517	0.169883	0.000212174	0.0870324	0.0591084	0.211349	3.71008e-06	0.169418	0.000220951	0.112969	0.0141646	0.160446	0.000473176	0.173157	0.000159037	0.13371	0.00364684	-0.0504744	0.274303	-0.00681559	0.882718	0.00659567	0.886477	0.149315	0.00115345
DLBC	0.0262181	0.859598	0.105623	0.474925	0.261396	0.0727159	0.273141	0.0603283	0.273363	0.0601113	0.0334821	0.821264	0.256803	0.0780748	0.22214	0.129142	0.0793052	0.592094	-0.402806	0.00453264	0.0611703	0.679595	0.0657338	0.65712	0.365644	0.0105989
ESCA	0.222873	0.00436238	0.33356	1.44087e-05	0.047857	0.545346	-0.0867813	0.272176	0.0856708	0.278382	0.385609	4.03379e-07	0.194431	0.0131658	0.0867535	0.27233	0.0186167	0.814102	0.0770856	0.329563	-0.263845	0.000692555	0.107818	0.172047	0.157246	0.0456766
GBM	0.062428	0.421453	0.0393995	0.612113	0.0448074	0.564126	0.128239	0.0976004	0.0622502	0.42278	-0.0695542	0.370317	0.11752	0.129237	0.0872381	0.260827	-0.0411259	0.596599	-0.0288674	0.710304	-0.0795316	0.305469	0.0517678	0.505139	0.0944634	0.223235
HNSC	0.147957	0.000883937	0.299838	6.90165e-12	0.0895377	0.0449469	0.145283	0.00109719	0.240957	4.60301e-08	-0.063267	0.15695	0.056386	0.207236	0.300331	6.3528e-12	0.143953	0.00122012	-0.010092	0.821546	0.293905	1.84812e-11	0.263013	2.17881e-09	0.155561	0.000468731
KICH	0.12009	0.34066	0.211267	0.0911488	0.300259	0.0150923	0.0347327	0.783567	-0.0315636	0.802898	0.0522896	0.679112	-0.0339843	0.788121	0.0280231	0.824634	0.408152	0.000738034	-0.257335	0.0385049	-0.264049	0.0335526	0.0517899	0.682013	-0.258166	0.0378611
KIRC	0.137579	0.00142296	0.0132749	0.759342	0.180651	2.63013e-05	0.135644	0.00166284	-0.0213499	0.622207	-0.0172242	0.691003	0.00714106	0.86911	0.0485774	0.262019	0.0504201	0.244329	-0.00991496	0.819022	0.0529449	0.221476	0.100826	0.019669	-0.0267445	0.53706
KIRP	0.146888	0.0124248	0.211266	0.000298189	0.173613	0.00306492	0.257691	9.12573e-06	0.0143422	0.808182	0.0330284	0.576024	0.252408	1.40641e-05	0.0939351	0.111048	-0.10899	0.0642675	-0.248438	1.93459e-05	-0.149777	0.0107853	-0.0143485	0.808099	0.0387007	0.512271
LAML	-0.00471144	0.954215	0.0822669	0.315275	0.0751357	0.359191	0.165774	0.0419281	0.016488	0.840747	0.165778	0.0419226	-0.211308	0.00920099	-0.104921	0.199801	0.0991732	0.225695	-0.124177	0.128731	0.256401	0.00148387	0.0823622	0.314713	-0.284561	0.000398343
LGG	0.0998496	0.0216273	0.206043	1.76043e-06	-0.213867	6.87528e-07	0.218649	3.8022e-07	0.00539394	0.901499	-0.126636	0.0035287	0.0458868	0.292133	0.103303	0.0174676	-0.234052	5.14338e-08	0.067409	0.121502	-0.0914587	0.0354673	-0.00153559	0.971892	0.0747643	0.0858117
LIHC	0.0746982	0.149366	0.0792484	0.126049	0.105036	0.042345	0.0313249	0.5459	0.217896	2.12836e-05	-0.165997	0.00127362	0.0578405	0.26452	0.0253073	0.62565	0.0561177	0.279037	0.15355	0.00290846	0.41306	7.642e-17	0.424555	8.4792e-18	0.0386797	0.455786
LUAD	-0.0745076	0.0878003	0.0206833	0.636008	0.176487	4.70047e-05	0.148981	0.000608359	0.0581429	0.183043	0.0817171	0.0610916	0.00347944	0.936547	-0.0561506	0.198531	0.169842	9.06024e-05	0.0282075	0.51859	0.175428	5.22721e-05	-0.0505015	0.247592	0.111376	0.0105809
LUSC	0.141905	0.00145023	0.251313	1.17799e-08	-0.25338	8.85217e-09	0.0324402	0.468767	-0.0599091	0.180636	0.0899143	0.0442617	-0.0652998	0.144424	0.291765	2.74367e-11	-0.140903	0.00156822	0.0968672	0.0301689	0.0219827	0.623518	-0.0724613	0.105236	-0.0191389	0.66912
MESO	-0.057954	0.596095	-0.0278102	0.79936	-0.104908	0.336403	0.149898	0.16834	0.173892	0.109325	-0.0343929	0.753238	-0.0480545	0.660392	0.0796632	0.465931	-0.0340901	0.755342	-0.0957394	0.380554	0.135352	0.214028	0.144143	0.185473	0.147222	0.176157
OV	0.204476	6.07124e-05	0.269553	9.86126e-08	-0.00281677	0.956413	0.095808	0.0624188	0.0525795	0.307284	0.0686815	0.182124	-0.04837	0.347678	0.101913	0.047406	-0.0250708	0.626585	-0.002157	0.966615	0.165851	0.00119285	0.235945	3.4188e-06	0.13425	0.00887596
PAAD	-0.194542	0.00926462	0.0276094	0.714492	-0.0474689	0.529214	0.156982	0.0363811	0.107828	0.151957	0.00568412	0.939974	-0.0375392	0.618849	0.0428998	0.569638	0.0276818	0.713776	-0.377681	2.02332e-07	-0.00441652	0.953343	0.162873	0.0298398	0.119405	0.112394
PCPG	-0.0217327	0.770275	0.448698	1.88724e-10	0.0594054	0.424394	0.302554	3.14342e-05	0.307797	2.24882e-05	0.0624844	0.400739	0.296572	4.57086e-05	0.335208	3.51029e-06	0.141608	0.0558564	-0.0214318	0.773369	0.0103373	0.88954	0.189266	0.0102867	0.212614	0.00385739
PRAD	0.0758148	0.0906913	0.210814	2.025e-06	0.111133	0.0129921	0.164061	0.000232669	0.168084	0.000161832	-0.0658089	0.142114	0.121339	0.00665278	0.188195	2.32355e-05	0.250348	1.43768e-08	-0.112311	0.0120559	0.133834	0.00273897	0.1801	5.20614e-05	0.173593	9.71208e-05
READ	0.2174	0.00477009	0.262289	0.000616586	0.0931689	0.231084	0.267045	0.000485497	0.112262	0.148623	0.190068	0.0138846	0.112469	0.147868	0.134095	0.0840439	0.06436	0.40862	0.116629	0.133359	0.020797	0.789649	0.12373	0.111146	0.0168061	0.829326
SARC	-0.0465809	0.451916	-0.0236287	0.70289	0.169332	0.00590636	0.0795672	0.198353	0.159894	0.00939243	-0.00721253	0.907326	0.00564449	0.927411	-0.0617882	0.318174	0.0763862	0.216949	0.000243701	0.996862	-0.0462994	0.454656	0.175933	0.00421093	0.116732	0.0586887
SKCM	0.221893	1.15273e-06	0.215648	2.31979e-06	-0.0120378	0.794428	0.223007	1.01531e-06	0.213241	3.0209e-06	-0.0736073	0.110626	0.188606	3.79909e-05	0.104915	0.0227771	0.0348816	0.450106	0.00419728	0.927612	0.270852	2.30667e-09	0.249752	3.94845e-08	0.204822	7.43192e-06
STAD	0.0836564	0.105786	0.00333177	0.948728	-0.010252	0.843146	0.0731105	0.157672	0.0155186	0.764534	0.0389802	0.451681	0.108068	0.0364497	-0.0198218	0.702013	0.015552	0.764043	0.0914879	0.0768182	0.201869	8.26021e-05	0.150967	0.00338403	-0.0409436	0.429205
TGCT	-0.422414	3.95558e-08	0.14249	0.0759889	-0.449465	3.96127e-09	-0.392037	4.16504e-07	-0.32076	4.45589e-05	0.0898476	0.264667	-0.186621	0.0196652	0.331793	2.32389e-05	-0.242761	0.00226178	-0.191355	0.0167129	0.619617	6.49805e-18	0.577211	3.08867e-15	-0.257222	0.00118868
THCA	0.0913465	0.0391938	0.0424835	0.33832	0.133264	0.00256466	0.0745578	0.0925762	0.133554	0.00250923	0.00264534	0.952479	0.130357	0.00318552	0.0436153	0.325597	-0.0618181	0.163331	-0.109146	0.013656	0.271235	4.7411e-10	0.23779	5.47911e-08	0.237437	5.74025e-08
THYM	0.00935377	0.91958	0.358208	6.33667e-05	-0.0683114	0.460401	0.372987	2.9454e-05	0.332564	0.000219618	-0.308915	0.000630129	-0.0363706	0.694542	0.220766	0.0158346	0.0483106	0.601845	-0.448084	3.22165e-07	0.521397	1.20287e-09	-0.0482369	0.602401	0.3598	5.84524e-05
UCEC	0.100055	0.0191417	0.241886	9.75904e-09	0.176628	3.20975e-05	0.279312	2.80368e-11	0.240185	1.24601e-08	0.041495	0.33226	0.206396	1.09844e-06	0.227396	7.3782e-08	0.0743409	0.0820862	-0.0510503	0.232828	0.147528	0.000530967	0.0441272	0.302478	0.281298	2.00212e-11
UCS	0.0844043	0.536257	0.276755	0.0389366	-0.0299199	0.826729	0.497869	9.4498e-05	0.277158	0.038641	0.0683114	0.616898	0.339284	0.0105254	0.0442451	0.746096	-0.295501	0.0270301	-0.0926494	0.497043	-0.165601	0.222565	0.144463	0.288115	0.329117	0.013258
UVM	0.380116	0.000505412	0.381327	0.000483273	0.269286	0.0157154	0.446075	3.36871e-05	0.196151	0.0811947	0.109829	0.332136	0.312081	0.00483006	0.256647	0.0215604	0.308167	0.00541964	0.00348932	0.975494	-0.00953007	0.933136	0.392973	0.000311255	0.196486	0.0806655

## Sheet: MMR
Association between HS6ST2 expression and mismatch repair (MMR) gene in pan-cancer
Cancer Type
	MLH1		MSH2		MSH3		MSH4		MSH5		MSH6		PMS1		PMS2
	Correlation	P-value	Correlation	P-value	Correlation	P-value	Correlation	P-value	Correlation	P-value	Correlation	P-value	Correlation	P-value	Correlation	P-value
ACC	0.146551	0.197474	0.230066	0.0413778	-0.0283914	0.803844	-0.0642682	0.573635	0.138659	0.222964	0.059581	0.601956	0.203522	0.0720199	-0.123374	0.278701
BLCA	0.0460184	0.352066	0.0485545	0.326132	0.16923	0.000570503	0.00592834	0.904625	0.181965	0.000208266	-0.0590621	0.232177	0.229315	2.63337e-06	0.104629	0.0339627
BRCA	0.0221257	0.462695	0.0947044	0.00163151	-0.0329644	0.273802	-0.0101154	0.737076	-0.0289768	0.336095	0.111328	0.000210251	0.126082	2.65413e-05	0.107531	0.000344633
CESC	0.103509	0.0705872	0.0535901	0.350161	0.0169943	0.767167	-0.0433325	0.450092	0.0188558	0.742518	0.126078	0.0274372	0.00623771	0.913464	0.11991	0.0360324
CHOL	-0.061574	0.721283	-0.0724953	0.674358	-0.0856733	0.61932	0.0673675	0.696253	-0.130751	0.4472	-0.0132203	0.939001	-0.170579	0.319897	0.06642	0.700326
COAD	-0.124556	0.00679862	0.216499	2.11156e-06	0.0535451	0.246127	0.171271	0.00018789	0.106942	0.0202655	0.216341	2.14881e-06	0.220737	1.31401e-06	0.17211	0.000174492
DLBC	0.187127	0.202817	0.154972	0.292916	0.268677	0.0648207	0.0360918	0.807588	0.24126	0.0985467	-0.0202485	0.891345	0.228817	0.117739	0.133808	0.364568
ESCA	-0.0586532	0.458457	0.123238	0.118199	0.132164	0.0936392	-0.0637102	0.420567	-0.351363	4.55029e-06	0.455457	1.13125e-09	-0.127469	0.105996	0.236307	0.00246664
GBM	0.169369	0.0281808	0.100117	0.196625	0.195382	0.0111474	0.123383	0.111073	-0.0842886	0.277354	0.013995	0.857113	0.0186424	0.810447	0.0459659	0.554084
HNSC	0.244531	2.86288e-08	0.288772	4.25498e-11	0.161293	0.000284964	0.0205809	0.645501	0.156692	0.000425451	0.344868	1.822e-15	0.237035	7.68427e-08	0.155579	0.00046801
KICH	0.122241	0.332016	0.2906	0.0188564	0.078563	0.533897	-0.0589211	0.641054	0.592367	2.01457e-07	0.0828773	0.511603	0.276099	0.0259969	0.111724	0.375592
KIRC	0.163493	0.000145668	0.207391	1.30848e-06	0.0385943	0.372965	-0.0704196	0.103733	-0.112527	0.00918859	0.138527	0.0013175	-0.0396684	0.359799	0.0500835	0.247497
KIRP	-0.011597	0.844374	0.282034	1.09866e-06	0.197694	0.000725766	0.19799	0.000712286	-0.101792	0.0840856	0.333611	6.09159e-09	0.152455	0.00944006	-0.0481543	0.414758
LAML	-0.114855	0.160232	0.0279224	0.733607	-0.117978	0.149094	-0.0502263	0.540241	0.0558301	0.495946	-0.00612345	0.940516	0.0144111	0.860589	-0.0921949	0.26021
LGG	0.0590681	0.174929	0.196398	5.34282e-06	0.23249	6.34088e-08	0.0226217	0.603667	-0.0153677	0.724357	0.0219269	0.614834	0.0804836	0.0643503	0.311281	2.38378e-13
LIHC	0.0338534	0.513957	0.219589	1.82872e-05	-0.05449	0.29324	0.00782592	0.880101	0.0479359	0.355244	0.214683	2.82918e-05	0.270038	1.13509e-07	0.109402	0.0344297
LUAD	0.0763917	0.0800474	0.0556972	0.202185	0.0804052	0.065378	-0.012435	0.776008	-0.0790173	0.0701782	0.123775	0.00447026	0.00739264	0.865681	0.141341	0.00115313
LUSC	0.0889286	0.0466501	0.0833735	0.0622182	-0.0193992	0.664892	-0.0529194	0.237061	0.0244292	0.5854	0.175824	7.6055e-05	0.0678908	0.129126	0.112139	0.0120166
MESO	0.104139	0.339977	0.0513497	0.638684	0.0385553	0.724504	0.0328135	0.764232	0.136134	0.211369	0.0174963	0.872966	0.116295	0.28628	-0.0393259	0.719224
OV	0.195623	0.000126648	0.15247	0.00292148	0.0585766	0.255298	0.0385262	0.454566	0.106756	0.0377654	0.279356	3.18374e-08	0.0341638	0.50727	0.109402	0.0332393
PAAD	0.203902	0.00633397	0.0408203	0.588508	0.109957	0.143985	0.0222939	0.767705	-0.153733	0.040482	0.0756025	0.315864	0.00822817	0.913198	0.150111	0.0455037
PCPG	0.347491	1.43841e-06	0.399407	2.13211e-08	0.437933	5.65965e-10	-0.0404075	0.587062	0.162229	0.0282274	0.171749	0.020085	0.234025	0.00142994	0.525186	2.30268e-14
PRAD	0.133859	0.00273388	0.2396	6.02851e-08	0.305212	3.22018e-12	-0.0836912	0.0617467	-0.072495	0.105774	0.130496	0.00349751	0.114349	0.0105777	0.248297	1.89983e-08
READ	0.0938531	0.227661	0.190863	0.013484	0.0737113	0.343795	0.013746	0.860049	0.0746071	0.337946	0.1908	0.0135153	0.229086	0.0029022	0.250717	0.00108311
SARC	-0.184624	0.00264959	0.00606767	0.921985	0.11808	0.0558114	0.0526611	0.395024	-0.105635	0.0873145	-0.0234676	0.704822	0.0219096	0.723591	0.30399	5.01198e-07
SKCM	-0.0178902	0.698562	0.172075	0.000175037	0.156006	0.000679908	0.116852	0.0111505	0.13363	0.00366721	0.201674	1.03081e-05	0.219215	1.55968e-06	0.144849	0.00162223
STAD	0.0824941	0.110739	0.0159451	0.758262	-0.0109547	0.832548	-0.0721994	0.162929	0.0675622	0.191736	0.106045	0.0401227	0.102807	0.0466481	0.0286094	0.580756
TGCT	0.251326	0.00155205	-0.329665	2.64002e-05	0.115409	0.151384	-0.47984	2.32584e-10	0.303349	0.000118379	-0.0677764	0.400524	-0.442631	7.22148e-09	-0.166248	0.0380613
THCA	-0.0481548	0.277723	0.028888	0.515099	-0.000357829	0.993568	0.0289236	0.514581	0.0736585	0.0965892	0.0858881	0.0525685	0.189797	1.59619e-05	-0.0622854	0.160166
THYM	0.0393071	0.671254	0.10729	0.245478	0.149161	0.105438	0.14757	0.109248	0.120759	0.190799	0.0196189	0.83228	0.103674	0.261844	0.15671	0.0887558
UCEC	0.0401893	0.34771	0.264	3.43641e-10	0.264903	2.97724e-10	0.0591799	0.166538	0.145766	0.000619784	0.212378	5.23129e-07	0.257562	9.40859e-10	0.203731	1.51803e-06
UCS	0.183222	0.176485	0.0784151	0.565659	0.0520419	0.703262	0.216941	0.10827	0.0705525	0.605363	0.0612942	0.653604	0.273128	0.0416796	0.301914	0.0237336
UVM	0.110951	0.327192	0.414782	0.000130578	0.240341	0.031759	0.0849929	0.4535	0.284321	0.0105882	0.380664	0.00049528	0.326686	0.00310055	0.210876	0.0604334

## Sheet: MSI 
Association between HS6ST2 expression and microsatellite instability (MSI) in pan-cancer
Cancer Type	MSI
	Correlation	P-value
ACC	0.0181488	0.873864
BLCA	-0.0703491	0.15608
BRCA	0.0350961	0.260213
CESC	-0.0481561	0.40435
CHOL	-0.0445302	0.796031
COAD	0.119565	0.0134241
DLBC	-0.159425	0.279096
ESCA	-0.138291	0.0811704
GBM	0.143269	0.0792678
HNSC	0.0295659	0.511216
KICH	-0.273493	0.0274964
KIRC	0.0947678	0.083282
KIRP	-0.00954812	0.872498
LAML	0.113428	0.357056
LGG	0.00686052	0.877413
LIHC	0.00211345	0.967726
LUAD	-0.158414	0.000324443
LUSC	0.0356807	0.429247
MESO	0.0846731	0.449448
OV	0.0515026	0.397524
PAAD	-0.0591457	0.436865
PCPG	0.043783	0.561711
PRAD	-0.134293	0.00275489
READ	-0.00498229	0.951424
SARC	0.111263	0.0773163
SKCM	0.032606	0.481635
STAD	-0.151194	0.00337847
TGCT	0.214781	0.00830551
THCA	0.0183269	0.685408
THYM	0.00625637	0.946392
UCEC	0.043372	0.315311
UCS	0.118562	0.384137
UVM	0.164789	0.144089

## Sheet: TMB 
Association between HS6ST2 expression and tumor mutational burden (TMB) in pan-cancer
Cancer Type	TMB
	Correlation	P-value
ACC	0.0254038	0.824135
BLCA	0.0387203	0.435388
BRCA	0.0291913	0.362793
CESC	0.00920667	0.876805
CHOL	-0.0564215	0.743787
COAD	0.104112	0.0383688
DLBC	-0.106211	0.53016
ESCA	-0.320279	3.64696e-05
GBM	-0.0360908	0.663212
HNSC	0.0719903	0.11075
KICH	0.0770014	0.542083
KIRC	-0.0604833	0.271808
KIRP	-0.0920487	0.125746
LAML	0.0123428	0.923513
LGG	-0.122043	0.00623625
LIHC	-0.104801	0.0472296
LUAD	-0.106997	0.0163671
LUSC	0.0641908	0.156821
MESO	0.201372	0.0751438
OV	0.0235722	0.698737
PAAD	-0.427098	4.52701e-08
PCPG	-0.122686	0.103777
PRAD	-0.199628	1.00597e-05
READ	0.0052445	0.952409
SARC	0.0669891	0.306499
SKCM	-0.0710419	0.126079
STAD	-0.309214	1.35505e-09
TGCT	0.124338	0.136211
THCA	-0.116115	0.010733
THYM	0.366016	4.94282e-05
UCEC	0.046215	0.29053
UCS	0.0208237	0.878925
UVM	0.0307896	0.786298

## Sheet: Tumor microenvironment 
Relationship Between HS6ST2 Expression and tumor microenvironment in pan-cancer
Cancer Type	Tumor microenvironment
	StromalScore		ImmuneScore
	Correlation	P-value	Correlation	P-value
ACC	0.046285	0.685441	-0.00362972	0.974673
BLCA	-0.33049	8.30115e-12	-0.289828	2.54121e-09
BRCA	0.123236	4.03053e-05	0.0241966	0.421873
CESC	-0.0785151	0.170703	-0.0637314	0.266391
CHOL	0.143115	0.40356	0.115058	0.502558
COAD	-0.0104964	0.820269	0.0351724	0.446336
DLBC	0.372232	0.00955991	0.242184	0.0972544
ESCA	0.147582	0.0609673	-0.107797	0.171957
GBM	-0.102609	0.185471	-0.12242	0.113854
HNSC	-0.0564903	0.206395	-0.0726358	0.104051
KICH	0.339597	0.00564783	0.181713	0.147427
KIRC	0.179539	2.95332e-05	-0.108354	0.0121496
KIRP	0.133997	0.0227054	-0.0774133	0.189421
LAML	-0.263028	0.00110264	-0.239877	0.00301111
LGG	-0.375924	0	-0.452022	0
LIHC	0.194879	0.000149081	0.156351	0.00242759
LUAD	0.0567321	0.193849	-0.0802383	0.065953
LUSC	-0.224584	4.07155e-07	-0.213699	1.46835e-06
MESO	0.0731652	0.503192	-0.292991	0.00618736
OV	-0.0918763	0.0740262	-0.200261	8.93169e-05
PAAD	0.245164	0.00100375	0.220962	0.0030957
PCPG	-0.0950553	0.200359	-0.104599	0.158654
PRAD	0.11167	0.0125926	-0.0152893	0.733241
READ	-0.0629593	0.418529	-0.154557	0.0462003
SARC	0.222483	0.000276298	-0.0516446	0.404224
SKCM	0.0304921	0.509157	-0.128168	0.00534171
STAD	0.165473	0.00130052	-0.0168506	0.744996
TGCT	0.466096	8.68303e-10	-0.417411	5.92457e-08
THCA	0.213535	1.13471e-06	0.131971	0.00282567
THYM	0.519662	2.20244e-09	-0.403554	6.45203e-06
UCEC	0.041714	0.329712	-0.0801732	0.0607183
UCS	0.0265208	0.84585	-0.330895	0.0130889
UVM	0.106221	0.348361	0.117331	0.299965

## Sheet: Immune cell infiltration
Relationship Between HS6ST2 Expression and Levels of Tumor Immune Cell Infiltration in pan-cancer
Cancer Type	Immune cell infiltration
	B cells naive		B cells memory		Plasma cells		T cells CD8		T cells CD4 naive		T cells CD4 memory resting		T cells CD4 memory activated		T cells follicular helper		T cells regulatory (Tregs)		T cells gamma delta		NK cells resting		NK cells activated		Monocytes		Macrophages M0		Macrophages M1		Macrophages M2		Dendritic cells resting		Dendritic cells activated		Mast cells resting		Mast cells activated		Eosinophils		Neutrophils
	Correlation	P-value	Correlation	P-value	Correlation	P-value	Correlation	P-value	Correlation	P-value	Correlation	P-value	Correlation	P-value	Correlation	P-value	Correlation	P-value	Correlation	P-value	Correlation	P-value	Correlation	P-value	Correlation	P-value	Correlation	P-value	Correlation	P-value	Correlation	P-value	Correlation	P-value	Correlation	P-value	Correlation	P-value	Correlation	P-value	Correlation	P-value	Correlation	P-value
ACC	-0.0144128	0.943119	-0.154785	0.440772	0.0899358	0.655516	0.0969272	0.630551	NA	1	-0.233568	0.240984	0.531537	0.00432776	0.295105	0.135082	0.0220732	0.912979	-0.142736	0.477561	0.0706891	0.726061	0.152934	0.44632	0.0581218	0.773376	0.530432	0.00442453	0.237081	0.233777	-0.159584	0.426554	-0.209984	0.29314	-0.166106	0.407645	-0.17131	0.392897	0.386323	0.0465413	NA	1	0.544936	0.00329013
BLCA	-0.0191671	0.74645	0.0255553	0.666385	0.113517	0.0547798	0.0711159	0.229735	NA	1	0.0139647	0.813667	-0.0385148	0.515772	0.10352	0.0799821	0.0894502	0.130585	NA	1	0.124873	0.0344698	-0.0437377	0.460464	-0.024294	0.68193	-0.197162	0.000783445	0.0471333	0.426354	-0.137561	0.0197992	0.0859452	0.146408	-0.0407856	0.491312	-0.0330386	0.577241	0.0221353	0.708847	0.0774212	0.190928	-0.0955553	0.106215
BRCA	0.118258	0.000122572	-0.0258913	0.401966	-0.0244053	0.429529	0.00517873	0.866889	NA	1	-0.0205749	0.505425	NA	1	0.05574	0.0710067	-0.0912344	0.00308654	NA	1	NA	1	-0.0460542	0.135872	NA	1	0.070638	0.0220755	0.00950482	0.758363	-0.149586	1.12285e-06	0.0690822	0.0251868	0.035447	0.251131	-0.0153017	0.62041	-0.0191539	0.535275	NA	1	-0.0503505	0.102968
CESC	-0.200213	0.00130881	0.105956	0.091329	0.00920891	0.883657	-0.0123042	0.844982	NA	1	0.00542605	0.93129	-0.0223746	0.722152	-0.0182891	0.771325	-0.150135	0.0164265	NA	1	-0.0668926	0.287268	0.0305479	0.627302	0.0134556	0.830686	-0.0407966	0.516637	0.0948141	0.131037	0.0311914	0.620064	0.0196162	0.75524	0.0574739	0.3607	-0.0527366	0.401704	0.110164	0.079107	0.123762	0.0483584	0.0261285	0.677952
CHOL	-0.00807192	0.965027	0.0295801	0.872324	-0.137109	0.454283	-0.255132	0.158353	NA	1	-0.33651	0.060239	NA	1	0.149835	0.413067	-0.0631657	0.731263	-0.0194119	0.916018	0.132762	0.468849	0.0106315	0.953948	-0.031688	0.863307	0.382472	0.0307413	0.061217	0.738544	-0.223607	0.217734	-0.0499185	0.786148	-0.137325	0.453568	-0.101838	0.579163	0.182637	0.317071	-0.214316	0.238849	0.272265	0.131674
COAD	-0.00379613	0.941672	0.0146177	0.778127	-0.104396	0.0436616	0.0789631	0.127423	NA	1	-0.06527	0.207791	0.0471045	0.36366	0.133194	0.0099168	-0.155731	0.0025272	NA	1	0.138431	0.00733833	0.0186633	0.71903	NA	1	0.00397953	0.93886	0.20053	9.42985e-05	-0.0146866	0.777007	0.0127157	0.806382	-0.0479806	0.354795	NA	1	-0.00731491	0.887876	NA	1	0.10007	0.0531569
DLBC	0.00618926	0.966698	0.0158982	0.914591	-0.279479	0.0543829	0.0277898	0.850985	NA	1	-0.130482	0.375551	0.0429188	0.772088	-0.0691489	0.639535	NA	1	0.202979	0.166462	0.0199036	0.893185	-0.125571	0.395091	0.0295144	0.842157	0.121906	0.407942	0.23274	0.111335	-0.156101	0.288392	-0.334767	0.0200322	NA	1	-0.0742509	0.615978	0.0566555	0.702104	NA	1	NA	1
ESCA	-0.0604244	0.528707	-0.0533192	0.578355	-0.0709021	0.459041	-0.0381321	0.691114	NA	1	-0.148148	0.120623	0.106152	0.267493	-0.119261	0.212497	-0.155635	0.102867	NA	1	-0.0944104	0.32432	0.221123	0.0196877	NA	1	0.0470377	0.623968	0.160204	0.0930314	0.23324	0.013922	0.280909	0.0028225	0.127278	0.183124	0.193428	0.0419446	-0.137192	0.151048	0.20002	0.035308	-0.172132	0.0708391
GBM	0.00657731	0.935263	-0.0167301	0.836309	0.00262124	0.974177	-0.00486654	0.952078	NA	1	-0.0526828	0.515021	NA	1	0.0426517	0.598228	NA	1	NA	1	-0.0628128	0.437483	-0.00824345	0.918915	NA	1	-0.0191069	0.813453	-0.0161828	0.841593	0.0621024	0.442275	NA	1	-0.060053	0.457922	NA	1	-0.0759799	0.3474	NA	1	-0.172349	0.0319985
HNSC	0.120489	0.00857216	-0.0756632	0.0995462	0.0698654	0.128379	0.0220128	0.632258	NA	1	0.00675802	0.88321	0.00187891	0.967422	0.0142531	0.756686	-0.111144	0.0153735	NA	1	-0.0561779	0.221666	-0.0343833	0.454693	-0.0206783	0.653047	0.052318	0.255112	0.0446588	0.331431	-0.0232298	0.613548	-0.132637	0.00378021	0.0609488	0.184813	0.132876	0.0037172	-0.145411	0.00148441	0.117919	0.0101055	-0.158414	0.000529501
KICH	-0.0342255	0.889373	0.464007	0.0453707	0.194737	0.422674	0.357895	0.132908	NA	1	0.250877	0.298872	NA	1	0.110721	0.651811	0.437266	0.0611884	-0.218727	0.36831	-0.437266	0.0611884	-0.582456	0.0101341	0.335235	0.160604	0.167617	0.492774	-0.149123	0.540955	-0.196491	0.418429	NA	1	-0.308373	0.19897	-0.359306	0.130831	0.512626	0.0248169	0.0723982	0.768346	0.0690293	0.778865
KIRC	0.0222739	0.623179	0.0599589	0.185606	0.117692	0.00918838	-0.185004	3.85198e-05	NA	1	0.104618	0.0206736	NA	1	-0.140977	0.00177741	-0.0856817	0.0583122	-0.0674899	0.136143	-0.0745834	0.0994835	0.0382153	0.399109	0.0121511	0.788681	0.158472	0.000435419	0.0243582	0.591031	-0.000528333	0.990702	0.128493	0.00442812	-0.177306	8.0778e-05	0.0329565	0.467158	0.0370311	0.413891	NA	1	0.0267172	0.555592
KIRP	-0.0120721	0.872576	0.0798226	0.28816	0.279556	0.000150738	0.105512	0.159818	NA	1	-0.167768	0.0247813	NA	1	0.00713742	0.924454	0.040167	0.593447	NA	1	NA	1	-0.0445213	0.554001	-0.111463	0.137421	-0.020741	0.78287	0.213129	0.00417685	-0.153163	0.0406657	0.0286626	0.703299	-0.035749	0.634723	-0.200627	0.00708474	-0.0818829	0.275856	NA	1	0.0970532	0.196205
LAML	0.194215	0.0168701	-0.170738	0.0360785	0.0290712	0.723085	0.161661	0.0473585	NA	1	0.0962175	0.239897	NA	1	NA	1	-0.00822034	0.920205	NA	1	0.172542	0.0341307	0.0314063	0.701857	-0.20962	0.0097886	NA	1	NA	1	-0.235972	0.00353548	NA	1	NA	1	-0.0745178	0.363167	0.0748965	0.360727	0.0699805	0.393196	-0.248967	0.00205183
LGG	0.187742	0.00021272	NA	1	-0.00644637	0.899541	-0.0504359	0.322994	NA	1	-0.103691	0.0417405	NA	1	-0.0343082	0.501545	0.00329954	0.94848	NA	1	0.0635444	0.212889	-0.0914403	0.0727411	-0.0227617	0.65574	0.051188	0.315822	-0.0919525	0.0711458	-0.0742883	0.145114	-0.0609524	0.232184	-0.0664349	0.192764	0.0463038	0.364269	-0.0333569	0.513488	0.0606519	0.234498	-0.120132	0.0182202
LIHC	-0.0224657	0.76085	0.186707	0.0107212	-0.0888914	0.227612	-0.125399	0.0881155	NA	1	0.0806942	0.273565	NA	1	-0.022394	0.761591	0.0463422	0.529938	NA	1	NA	1	0.00310935	0.966403	0.0340356	0.644664	0.128509	0.080453	-0.0145705	0.843525	-0.197176	0.00698559	0.143385	0.0508873	-0.0389618	0.597509	-0.0542003	0.462491	0.0793793	0.281484	NA	1	-0.000828204	0.991049
LUAD	-0.039761	0.36415	0.0490947	0.262396	-0.0832872	0.0569986	-0.137809	0.00158243	NA	1	0.192371	9.78509e-06	-0.0285475	0.514769	-0.145625	0.000837268	0.02535	0.562967	NA	1	-0.013694	0.754709	-0.106796	0.0145458	0.107974	0.0134885	-0.207717	1.65702e-06	-0.0841261	0.0545176	0.0129401	0.767741	0.229453	1.12181e-07	0.140376	0.00128837	0.235255	5.21561e-08	-0.0673857	0.123775	NA	1	-0.0639377	0.144235
LUSC	0.0357864	0.429771	-0.0224669	0.62017	0.0692597	0.126115	0.0215673	0.634245	NA	1	-0.0237947	0.599525	-0.00690646	0.878922	-0.0463906	0.30594	-0.111727	0.0134329	NA	1	0.104978	0.0202389	-0.0396625	0.381481	-0.0756896	0.0945508	-0.0580969	0.199663	-0.0314367	0.487956	0.155844	0.000550817	-0.134476	0.00288577	0.158177	0.00044644	0.0963477	0.0331654	-0.0479747	0.289702	0.0707887	0.117975	-0.0530554	0.241577
MESO	-0.0185168	0.868852	0.186719	0.0930222	-0.204719	0.0650455	-0.140086	0.209384	NA	1	-0.00941456	0.9331	-0.166664	0.134517	-0.194619	0.0797586	-0.092915	0.40639	-0.200418	0.0710176	0.0788878	0.481127	-0.00179584	0.987225	0.123212	0.270107	-0.0782688	0.484585	-0.166168	0.135697	0.140217	0.208955	0.249103	0.0240207	0.0399702	0.721443	0.0320373	0.775085	-0.00475871	0.966155	NA	1	-0.0892542	0.425209
OV	0.212553	0.000349769	-0.160808	0.00711297	0.106404	0.0760048	-0.0701202	0.243042	NA	1	-0.0292649	0.626247	NA	1	-0.0736756	0.21991	0.031393	0.601573	NA	1	NA	1	0.0827214	0.168241	-0.0668846	0.265526	0.0629556	0.294692	-0.0884087	0.140758	-0.128051	0.0325703	-0.031778	0.597119	0.0111696	0.85265	0.000757289	0.989953	-0.125952	0.0354872	NA	1	0.0385793	0.521037
PAAD	0.0559088	0.481167	0.0422991	0.594191	0.0192374	0.808418	0.0625604	0.430066	NA	1	0.282028	0.000305333	NA	1	-0.0401424	0.613148	-0.159976	0.0426496	NA	1	NA	1	-0.206305	0.00864904	0.239565	0.00220781	-0.196472	0.0124923	0.146777	0.0631755	-0.133532	0.091268	0.134475	0.0889918	-0.269545	0.000544764	0.181109	0.0214959	-0.132522	0.0937749	NA	1	0.0621978	0.433151
PCPG	-0.255338	0.165641	0.263974	0.151304	0.0495968	0.790616	-0.0435528	0.816043	NA	1	0.116935	0.529498	NA	1	-0.290765	0.112538	0.035473	0.849741	NA	1	-0.0806091	0.666416	-0.246874	0.180609	0.381606	0.0341511	-0.346426	0.0562427	-0.289948	0.113598	0.166935	0.367864	0.128087	0.492279	0.282547	0.123541	0.192623	0.299192	0.292674	0.11009	NA	1	0.332556	0.0675611
PRAD	0.108255	0.0785681	NA	1	-0.052569	0.393802	-0.0405641	0.510625	NA	1	0.115794	0.0598137	NA	1	0.00347894	0.955051	-0.182675	0.00283729	NA	1	NA	1	-0.135078	0.0279059	0.0554716	0.36842	0.00585291	0.924451	0.0392909	0.524235	-0.0440191	0.475265	0.108632	0.0775186	-0.0958893	0.119429	0.01866	0.762383	0.0879137	0.153542	NA	1	NA	1
READ	0.169287	0.0730525	-0.0949538	0.317111	-0.0491466	0.604694	-0.14892	0.115351	NA	1	-0.00192129	0.983895	-0.0559656	0.556016	0.111951	0.237785	-0.137283	0.147063	NA	1	NA	1	0.163724	0.083137	NA	1	0.0104631	0.91231	-0.0560417	0.55494	-0.0247106	0.794736	NA	1	0.164787	0.081128	NA	1	0.150351	0.111869	NA	1	0.0227693	0.81081
SARC	0.185889	0.00945729	-0.167699	0.019426	-0.0784578	0.276858	0.00522992	0.942304	NA	1	-0.307483	1.29354e-05	0.013703	0.849594	-0.0106756	0.882551	-0.0121386	0.866595	0.0196955	0.785175	NA	1	0.0987693	0.170637	-0.0602183	0.404235	0.00331055	0.96346	-0.0468821	0.516255	0.151224	0.0353073	-0.238452	0.000813343	0.147228	0.0405043	0.0250874	0.728424	-0.0423293	0.557854	NA	1	0.171503	0.0167995
SKCM	0.0981125	0.0746596	-0.066951	0.224434	0.0704936	0.200806	-0.0701402	0.203078	NA	1	0.116201	0.034579	-0.0440211	0.424725	-0.0722473	0.189802	-0.103495	0.0599917	0.0567949	0.302909	NA	1	-0.204688	0.000177071	-0.131142	0.0169768	-0.0658427	0.232217	-0.0139633	0.800197	0.0734987	0.182224	-0.0733993	0.182818	0.102363	0.0628612	0.0952408	0.0836064	-0.0251543	0.648402	NA	1	NA	1
STAD	0.16733	0.00199267	-0.0379981	0.485623	-0.00814466	0.881232	-0.0346984	0.524322	NA	1	0.175893	0.00114613	-0.159438	0.00324441	-0.0676703	0.213954	-0.0469122	0.389222	NA	1	-0.12064	0.0263418	-0.0202568	0.710171	NA	1	-0.0777138	0.153367	-0.00613165	0.910443	0.0110307	0.839641	0.162825	0.00263883	-0.139174	0.0103026	0.164314	0.0024068	-0.150373	0.0055333	NA	1	-0.154576	0.00433501
TGCT	-0.063996	0.449268	NA	1	0.05273	0.533133	-0.241297	0.0038177	NA	1	0.0284061	0.737192	-0.166379	0.0478244	-0.228625	0.00620702	-0.0956322	0.257586	NA	1	-0.383332	2.49297e-06	0.489748	6.19075e-10	0.0692854	0.412605	-0.014345	0.865452	-0.38813	1.81791e-06	0.313102	0.000148292	0.278934	0.000775287	NA	1	0.177288	0.034797	NA	1	NA	1	NA	1
THCA	-0.048664	0.41147	NA	1	-0.045715	0.44042	0.00926007	0.87588	NA	1	0.194352	0.000952366	NA	1	0.179901	0.00221774	-0.161228	0.00619284	NA	1	-0.124395	0.0351719	-0.0740136	0.211258	-0.0958001	0.105318	-0.0370855	0.531485	0.136695	0.0205289	-0.00626254	0.915825	0.0732645	0.215929	-0.229131	8.96466e-05	0.165153	0.00503246	-0.0839683	0.155954	NA	1	NA	1
THYM	-0.165296	0.0736499	NA	1	-0.297051	0.00108882	-0.00759991	0.934833	NA	1	0.227551	0.0132073	NA	1	-0.149964	0.104998	-0.0792466	0.39365	NA	1	-0.00856951	0.926619	0.0958586	0.301797	-0.434092	9.06337e-07	-0.0691489	0.456849	0.175338	0.0576402	0.424681	1.64311e-06	-0.0439954	0.636175	0.139228	0.132675	-0.0792732	0.393491	NA	1	NA	1	NA	1
UCEC	0.104911	0.0404231	-0.136921	0.00736307	0.0283575	0.580581	0.0276337	0.590282	NA	1	0.0724834	0.157393	NA	1	0.00797869	0.87648	-0.0947478	0.0643245	NA	1	-0.0690302	0.178184	-0.103832	0.0425376	-0.151246	0.00304214	0.0370139	0.470721	0.0888944	0.082711	-0.0684602	0.181803	0.0368348	0.472872	-0.0572116	0.264662	0.0179806	0.72611	-0.0413041	0.420831	NA	1	-0.00647551	0.899614
UCS	0.127973	0.570339	-0.111495	0.621321	0.359785	0.100042	-0.199322	0.372139	NA	1	0.131564	0.558023	NA	1	-0.476002	0.0264541	0.056806	0.801742	0.116109	0.606863	NA	1	-0.431959	0.0459595	0.351313	0.108889	0.586674	0.00482057	-0.166385	0.459273	-0.0739695	0.743265	-0.11831	0.600014	-0.102318	0.650483	-0.238637	0.284835	0.228751	0.305851	NA	1	NA	1
UVM	-0.0350877	0.888222	NA	1	-0.107206	0.662229	0.612281	0.00633216	NA	1	-0.570175	0.0121607	0.291652	0.22569	0.587719	0.00935427	0.332666	0.164035	0.183574	0.451879	NA	1	-0.277193	0.24962	-0.245666	0.310687	-0.554386	0.0152372	0.307152	0.200846	-0.310526	0.195286	NA	1	0.457085	0.0491254	-0.331579	0.165481	NA	1	NA	1	NA	1

## Sheet: chemokines
Relationship Between HS6ST2 Expression and Levels of Immune-Related Genes in pan-cancer
Cancer Type
	CCL19		CCL20		CCL21		CCL24		CCL26		CCL27		CCL28		XCL1		XCL2		CXCL1		CXCL2		CXCL3		CXCL5		CXCL6		CXCL8		CXCL9		CXCL10		CXCL11		CXCL13		CXCL14
	Correlation	P-value	Correlation	P-value	Correlation	P-value	Correlation	P-value	Correlation	P-value	Correlation	P-value	Correlation	P-value	Correlation	P-value	Correlation	P-value	Correlation	P-value	Correlation	P-value	Correlation	P-value	Correlation	P-value	Correlation	P-value	Correlation	P-value	Correlation	P-value	Correlation	P-value	Correlation	P-value	Correlation	P-value	Correlation	P-value
ACC	0.0214963	0.850845	0.57091	3.9348e-08	0.0443451	0.697974	0.145519	0.200682	0.123482	0.278279	0	1	-0.138992	0.221844	0.0171441	0.880794	0.0628513	0.582131	0.591344	9.57058e-09	0.417034	0.000131655	0.617504	1.34834e-09	0.392812	0.00034253	0.456441	2.35943e-05	0.581659	1.89321e-08	0.444844	4.00083e-05	0.511557	1.44948e-06	0.527729	5.80442e-07	0.440644	4.82151e-05	-0.0417565	0.714825
BLCA	-0.184757	0.000165435	-0.152574	0.00192272	-0.245585	4.63061e-07	-0.121923	0.013381	-0.233768	1.65692e-06	0	1	-0.142421	0.0038124	0.0559827	0.257476	-0.143198	0.00362318	-0.139557	0.00458953	-0.279777	7.91234e-09	-0.210774	1.64335e-05	-0.240188	8.35715e-07	-0.0522961	0.290192	-0.0661869	0.180506	-0.195673	6.51048e-05	-0.220571	6.36906e-06	-0.18195	0.000208517	-0.224913	4.12602e-06	0.00612522	0.901473
BRCA	-0.0844424	0.00499179	0.0691935	0.021493	-0.039925	0.184974	0.0462264	0.124779	-0.0105608	0.725956	-0.0317092	0.292499	-0.0521129	0.0834975	-0.0161063	0.592937	-0.0257562	0.392574	0.16302	5.12467e-08	0.0684369	0.0229655	0.0752495	0.0123846	0.117613	8.96461e-05	0.135029	6.72881e-06	0.223725	5.44872e-14	-0.00574966	0.848662	-0.0117847	0.695698	-0.0132651	0.659739	0.0116985	0.697814	-0.0142455	0.636344
CESC	-0.100323	0.0797449	0.0209229	0.715453	-0.00384707	0.946565	-0.0243052	0.671938	0.155928	0.00627212	0	1	-0.0152825	0.790043	-0.0211367	0.712673	-0.0851679	0.137164	0.141753	0.0130627	0.0303987	0.596315	-0.0356413	0.534524	0.0308801	0.590509	0.101686	0.0757158	0.206581	0.000274535	-0.00474188	0.934162	0.013538	0.813541	0.026048	0.649925	0.0261368	0.648812	-0.00110954	0.984578
CHOL	-0.0717752	0.677417	0.153942	0.37003	0.0381308	0.825255	0.0667487	0.698912	0.00796174	0.963242	0	1	-0.0633104	0.71375	-0.102791	0.550798	-0.154582	0.368021	0.230809	0.175625	0.0983021	0.568419	0.175524	0.305857	0.158022	0.357325	0.0138738	0.935992	0.358941	0.0315662	-0.0969273	0.573866	-0.00558845	0.974195	-0.0607352	0.724932	-0.0330828	0.8481	-0.0588395	0.733199
COAD	-0.0319645	0.488909	-0.0295356	0.522541	0.0393457	0.394235	-0.106568	0.0207088	0.0554507	0.229694	0	1	-0.0185699	0.6877	0.117409	0.0107684	0.0874614	0.057864	0.0160284	0.728625	0.0653065	0.15705	0.0503676	0.27532	0.100641	0.0289694	0.037371	0.418416	0.109263	0.0176878	0.167826	0.000253643	0.152331	0.000911328	0.137768	0.00273306	0.153802	0.000811136	-0.0625419	0.175405
DLBC	-0.174849	0.234581	0.338049	0.0187743	-0.279	0.0548153	-0.202955	0.166514	-0.260858	0.0733276	0	1	0.061475	0.678085	0.15093	0.305839	0.0600953	0.68493	0.31921	0.0270034	0.359591	0.0120648	0.279634	0.0542431	0.290192	0.0454147	0.174953	0.234298	0.329964	0.0220004	0.259868	0.074465	0.413949	0.00344718	0.427338	0.00245039	0.162989	0.268347	-0.0986366	0.504779
ESCA	-0.026833	0.734651	-0.285554	0.000230184	0.347708	5.79848e-06	-0.306163	7.42558e-05	0.44446	3.12415e-09	0	1	-0.506283	6.28236e-12	0.368841	1.36798e-06	-0.00163412	0.983534	-0.272689	0.000446999	-0.507008	5.7971e-12	-0.55774	1.26135e-14	-0.164103	0.0369168	-0.100728	0.202175	-0.118377	0.133534	0.0229646	0.771766	0.111672	0.157134	-0.111509	0.157745	-0.00578843	0.941723	0.391992	2.48839e-07
GBM	0.018677	0.810102	0.00153585	0.984236	0.00967378	0.900956	0.135171	0.0806436	0.0715319	0.356832	0	1	0.00720367	0.926162	-0.0868714	0.262845	-0.125247	0.10574	-0.08233	0.288711	-0.166006	0.0315103	-0.128243	0.0975902	-0.0670671	0.387713	-0.0483469	0.533723	-0.00984702	0.899192	-0.0646338	0.405203	-0.215136	0.0051018	-0.169656	0.0279109	0.0232539	0.764791	-0.0927416	0.231824
HNSC	0.0740228	0.097591	0.00502721	0.910541	-0.0344713	0.440917	0.0146533	0.743281	0.142274	0.00139334	0	1	0.0566229	0.205331	0.0286017	0.522586	0.0635306	0.155226	-0.0514265	0.250096	-0.0659815	0.139873	-0.0199668	0.655386	-0.00455961	0.918832	-0.0418984	0.348851	-0.0105706	0.813235	0.0155036	0.728954	-0.0401356	0.36952	-0.0452329	0.311801	0.0627942	0.160079	-0.174271	8.67499e-05
KICH	0.122419	0.331307	-0.0519471	0.6811	-0.14806	0.239181	-0.0894613	0.478518	0.0597945	0.636107	0	1	0.141732	0.260078	0.10639	0.39895	-0.107514	0.393959	0.0443694	0.725626	0.0770531	0.541811	-0.00502827	0.96829	0.022761	0.857178	-0.0167343	0.894741	-0.0354437	0.779248	-0.0952067	0.450607	-0.0509785	0.686735	-0.0996456	0.429674	-0.0898432	0.476634	0.55316	1.76497e-06
KIRC	0.0273843	0.527362	-0.106256	0.0139352	0.116604	0.0069349	0.0326903	0.450513	0.0878025	0.0423515	0	1	-0.0952222	0.0276406	-0.0919794	0.033418	-0.154039	0.00034894	0.0762025	0.078237	-0.0440303	0.309375	0.1193	0.00573005	0.0478331	0.269407	0.0577538	0.182257	0.15187	0.000423455	-0.162269	0.000163565	-0.16874	8.78177e-05	-0.13174	0.00226308	-0.0487723	0.260107	-0.087714	0.0425608
KIRP	0.132438	0.0243469	0.03542	0.548693	0.0709936	0.228907	-0.0604384	0.305865	0.013565	0.81839	0	1	-0.276674	1.78242e-06	0.0453193	0.442794	-0.0452595	0.443397	-0.230066	7.9052e-05	-0.220715	0.000155174	-0.155945	0.00791118	-0.172212	0.00331528	-0.281253	1.17972e-06	-0.117381	0.0461815	0.0803269	0.173248	0.130542	0.0264803	0.155198	0.00821851	0.197074	0.00075485	-0.263777	5.47963e-06
LAML	0.0724103	0.376934	0.0390002	0.634472	-0.048026	0.558153	-0.0160312	0.845103	0.0865323	0.290752	0.0355291	0.664944	-0.0132709	0.87152	0.0185054	0.821569	0.0321897	0.694786	0.0360359	0.660459	0.0541827	0.508766	-0.0130855	0.8733	-0.0153189	0.851905	-0.0879737	0.28276	-0.166516	0.0410067	0.0724463	0.376696	-0.0287448	0.726069	-0.00873489	0.915228	-0.02145	0.793767	-0.0899302	0.27215
LGG	-0.0879981	0.0430633	-0.223471	2.06387e-07	-0.129297	0.00288888	0.0726186	0.0952206	-0.050298	0.248153	0.0411463	0.3449	0.1284	0.00309178	-0.133216	0.00213763	-0.186666	1.55175e-05	0.00121824	0.977699	-0.0744524	0.087131	-0.0871724	0.0450659	0.0620912	0.153841	-0.0874225	0.0444513	0.00381935	0.930165	-0.135488	0.00178858	-0.175726	4.82784e-05	-0.1308	0.00257618	0.0229615	0.598239	0.17315	6.24635e-05
LIHC	0.125354	0.0152795	0.187327	0.000269569	0.0987084	0.0564948	0.0426382	0.410965	0.0878004	0.089967	0	1	0.141145	0.00625377	0.265884	1.79909e-07	0.0736834	0.154988	0.130566	0.0114907	-0.104324	0.0437711	0.0754002	0.145569	0.172329	0.000818085	0.121392	0.0188519	0.129513	0.0121817	0.0693924	0.180536	0.00286472	0.955967	0.00624485	0.904193	0.0245682	0.63578	0.0737588	0.154564
LUAD	-0.0130923	0.764508	-0.011751	0.788027	-0.159483	0.000240174	-0.1426	0.00103994	-0.131214	0.00256772	0	1	-0.0389794	0.37229	-0.14992	0.000561193	-0.118618	0.00645736	-0.0680279	0.119164	0.0319171	0.465113	-0.163018	0.000173325	-0.203677	2.48182e-06	-0.0629263	0.149531	0.0372873	0.393418	-0.06619	0.129494	-0.0552512	0.205828	-0.102234	0.019013	-0.0769502	0.0778589	0.100358	0.0213345
LUSC	-0.169436	0.000138623	-0.228622	2.30181e-07	-0.117964	0.00821673	-0.0508057	0.256343	0.273833	4.56284e-10	0	1	-0.265339	1.6122e-09	-0.163992	0.000227391	-0.127541	0.00424556	-0.141664	0.00147783	-0.145044	0.0011313	-0.170796	0.000122209	-0.100001	0.0251991	-0.135879	0.00230416	-0.0148883	0.739564	-0.0565108	0.206685	-0.155278	0.000486482	-0.170032	0.000131195	-0.231105	1.68693e-07	0.0518238	0.246924
MESO	-0.10122	0.35376	-0.0211275	0.846894	-0.085676	0.432838	-0.00693295	0.949485	0.0283434	0.795595	0	1	0.164865	0.129285	-0.252546	0.0189806	-0.336176	0.00155304	-0.109505	0.315537	-0.091487	0.402166	0.100332	0.358017	-0.0258842	0.812992	-0.0721652	0.509061	-0.0672879	0.538179	-0.163462	0.132624	-0.216543	0.0452223	-0.14007	0.198337	-0.283616	0.00813932	-0.0389822	0.721577
OV	-0.0592724	0.249687	-0.0154698	0.764033	0.0369533	0.473206	0.00688106	0.893783	0.0583411	0.257217	0	1	-0.0715137	0.16471	0.0344434	0.503799	-0.193845	0.000146241	-0.0456722	0.375258	-0.0280799	0.585781	0.0114327	0.824436	0.0825247	0.108711	0.0580627	0.259498	0.0316396	0.539164	-0.147089	0.00410886	-0.192563	0.000162095	-0.187236	0.00024683	-0.125946	0.0141441	-0.0526028	0.307069
PAAD	0.0725131	0.336101	-0.204903	0.00607579	0.141577	0.0594196	-0.155858	0.0377586	0.193172	0.00978171	0	1	-0.147567	0.0493344	-0.0657472	0.383241	0.0475037	0.528912	-0.0817234	0.278161	-0.0914899	0.224528	-0.19958	0.00756502	-0.16584	0.0269439	0.00550859	0.941825	-0.124373	0.0981111	0.0320379	0.671175	-0.0354534	0.638481	-0.0314796	0.67658	0.034876	0.643962	-0.0816545	0.278568
PCPG	-0.0550067	0.459556	-0.0988466	0.183099	-0.0656443	0.377297	0.0621093	0.403578	-0.262661	0.000327962	0	1	0.140242	0.058288	0.117602	0.112853	0.0163613	0.826004	0.00968784	0.89644	-0.0739196	0.319991	-0.0443922	0.550703	-0.0723797	0.330204	0.0537587	0.469819	0.0122083	0.869712	-0.000483285	0.994819	0.0216629	0.770993	0.0161319	0.828405	-0.119437	0.107307	-0.132851	0.0730022
PRAD	-0.0253951	0.571426	0.0142113	0.751489	0.018788	0.675452	0.00224691	0.960069	-0.0845164	0.0592148	0	1	0.141817	0.00149279	-0.107427	0.0163654	-0.0594758	0.184697	-0.0624668	0.16354	-0.0940835	0.0356359	-0.0731747	0.102534	-0.0218742	0.625929	-0.0338943	0.449973	-0.00508833	0.909729	0.00473494	0.915974	0.00110241	0.980403	0.0267646	0.550853	0.0503412	0.26168	-0.0870732	0.0519096
READ	-0.168982	0.0290325	0.128577	0.0977267	-0.0629498	0.418985	-0.0159611	0.837785	-0.104827	0.177593	0	1	-0.126456	0.103432	0.162973	0.0353479	-0.131045	0.0914036	0.0497553	0.523118	0.0434434	0.577214	0.0267674	0.731317	0.0510417	0.512418	0.0278196	0.721184	0.0877354	0.259552	-0.00633857	0.935205	-0.00544463	0.944327	-0.0085746	0.912427	0.0186701	0.810734	-0.0383239	0.622921
SARC	-0.118887	0.0541441	-0.00660625	0.915085	-0.157478	0.0105373	-0.0349026	0.573094	0.0643498	0.298486	0	1	-0.251393	3.72501e-05	-0.0574591	0.353326	-0.05994	0.332893	0.108971	0.0777244	-0.1384	0.0247943	-0.0866618	0.161106	-0.0262577	0.671658	0.166204	0.00690586	0.0423871	0.493699	-0.0421161	0.496469	-0.0670098	0.278916	-0.0396633	0.5219	-0.00457163	0.94118	0.0396854	0.521669
SKCM	-0.209807	4.3806e-06	-0.0864545	0.0608191	-0.166477	0.000284817	0.00853644	0.853407	0.0728994	0.114107	0	1	-0.130965	0.00441347	-0.0640403	0.165268	-0.147946	0.00128186	-0.220092	1.41323e-06	-0.0387171	0.401839	-0.0152714	0.740972	0.0918965	0.0462278	0.101587	0.0274868	-0.0791656	0.0861213	-0.169532	0.000218784	-0.148874	0.0011935	-0.130603	0.00452489	-0.1626	0.000395513	-0.0993108	0.0311697
STAD	-0.0303493	0.557954	-0.115109	0.0258106	-0.0308103	0.551986	-0.0910111	0.0783751	-0.0634647	0.220153	0	1	-0.122013	0.0180924	0.190397	0.000208325	-0.0701593	0.175174	-0.178335	0.000520894	-0.133632	0.00957612	-0.256547	4.75449e-07	-0.073776	0.153914	-0.0292066	0.572879	-0.0803425	0.120389	-0.0433895	0.40213	-0.050426	0.330128	-0.0614422	0.235239	-0.0580459	0.262183	0.0372019	0.4726
TGCT	-0.453218	2.83238e-09	0.231834	0.00359009	-0.219136	0.00598706	-0.347433	8.83973e-06	-0.227351	0.00431389	0	1	0.141098	0.0789276	-0.0998293	0.214998	-0.370471	1.93145e-06	0.390374	4.70671e-07	0.238899	0.00266928	0.199766	0.0124099	0.379298	1.04453e-06	0.270023	0.000651992	0.343819	1.11031e-05	-0.533377	7.56896e-13	-0.300968	0.000134669	-0.297666	0.00016074	-0.142524	0.0759184	0.22237	0.0052694
THCA	0.0832427	0.0603081	-0.222842	3.69165e-07	0.0943139	0.0332187	0.0157694	0.722387	0.134637	0.00231179	0	1	-0.25176	8.18018e-09	0.0942031	0.033427	0.115995	0.00874229	-0.0607524	0.170724	0.107811	0.014857	-0.0268505	0.545186	-0.127571	0.00390559	-0.00305464	0.945137	-0.0752927	0.0893967	0.0764062	0.0847473	0.0669029	0.131334	0.0431216	0.331108	0.0548892	0.215915	0.231518	1.23931e-07
THYM	-0.672929	5.18405e-17	-0.00709212	0.938981	-0.397568	7.56456e-06	-0.0471687	0.610471	-0.0523836	0.571533	0	1	0.0905183	0.327566	0.252964	0.00550864	0.0443497	0.631991	0.546072	1.33392e-10	-0.175714	0.0559425	-0.171327	0.0624579	0.255618	0.00501922	0.533208	4.29188e-10	0.0174276	0.850782	0.211101	0.0211909	0.227146	0.0129814	0.168916	0.0662941	-0.152216	0.0984137	-0.446575	3.56698e-07
UCEC	-0.0717631	0.0932963	0.106802	0.012363	-0.00625351	0.883876	0.0460586	0.281787	-0.0314974	0.461831	0	1	0.0732426	0.0867214	-0.0468723	0.273364	0.0107145	0.80239	-0.00181324	0.96622	0.0519212	0.224944	0.0543406	0.204044	0.163414	0.000121763	0.0666443	0.119168	0.130754	0.00216173	0.0690514	0.106378	0.0947149	0.0266134	0.118276	0.00556814	0.0429343	0.315748	0.0480798	0.261183
UCS	-0.320961	0.0158709	0.15793	0.245033	-0.363901	0.00583375	0.14307	0.292841	0.143538	0.291246	0	1	-0.136022	0.317507	-0.29059	0.0298067	-0.346336	0.00892917	-0.0504941	0.711698	0.0186372	0.891557	0.0361434	0.791427	0.110612	0.41704	0.0465628	0.733276	0.0668249	0.6246	-0.216637	0.108778	-0.233766	0.0829173	-0.257813	0.0550672	-0.210427	0.119552	0.0589492	0.66606
UVM	-0.0940581	0.406605	-0.034142	0.763676	-0.0553075	0.626065	0.173863	0.122982	-0.00346356	0.975675	0	1	-0.0225763	0.842438	0.071185	0.530349	0.0874237	0.44064	-0.00939054	0.934113	0.0170496	0.88068	0.0168826	0.88184	0.0699123	0.537744	-0.0711543	0.530526	0.0462679	0.683613	0.100633	0.374444	0.201456	0.0731434	0.128061	0.257612	0.10634	0.347816	-0.0988675	0.382924

## Sheet: chemokines receptor
Relationship Between HS6ST2 Expression and Levels of Immune-Related Genes in pan-cancer
Cancer Type	CCR1		CCR2		CCR3		CCR4		CCR5		CCR6		CCR8		CCR9		XCR1		CXCR1		CXCR2		CXCR3		CXCR4		CXCR6		CX3CR1
	Correlation	P-value	Correlation	P-value	Correlation	P-value	Correlation	P-value	Correlation	P-value	Correlation	P-value	Correlation	P-value	Correlation	P-value	Correlation	P-value	Correlation	P-value	Correlation	P-value	Correlation	P-value	Correlation	P-value	Correlation	P-value	Correlation	P-value
ACC	0.413858	0.000149862	0.184514	0.103553	0.0423991	0.710629	0.148247	0.19228	0.273511	0.014729	0	1	0.0286796	0.801893	-0.0131987	0.90809	0.00516663	0.963956	0.484226	6.1411e-06	0.518504	9.83978e-07	0.257767	0.0218211	-0.152899	0.178541	0.314647	0.00474024	0.0115819	0.919308
BLCA	-0.253959	1.80219e-07	-0.253157	1.97561e-07	-0.0869632	0.078241	-0.135453	0.00595266	-0.262112	6.95945e-08	-0.10636	0.0310991	-0.121605	0.0136264	-0.0530263	0.2835	-0.00963361	0.845618	-0.119682	0.0151962	0.119705	0.0151764	-0.23159	2.08069e-06	-0.227478	3.17966e-06	-0.17701	0.000310784	-0.0115743	0.815032
BRCA	-0.0270226	0.369712	0.00512652	0.864897	0.0903111	0.00266929	-0.0327116	0.277501	-0.0411126	0.172235	0.00420388	0.889037	0.0215266	0.474903	-0.0148694	0.621642	-0.035093	0.243997	-0.0194747	0.518018	0.0148147	0.622925	-0.0704117	0.0192948	0.0505029	0.0935029	0.0103093	0.732229	-0.000992135	0.973732
CESC	-0.0222045	0.698847	-0.0564963	0.324612	0.113281	0.0477171	-0.0244547	0.670039	-0.0727922	0.20415	-0.0564553	0.324964	0.0220124	0.701327	-0.162222	0.00444146	-0.00514915	0.928521	0.108116	0.0588834	0.120078	0.0357725	-0.130544	0.0223705	-0.130258	0.0226684	-0.0815549	0.15469	-0.0497374	0.385928
CHOL	0.0242429	0.888388	-0.12398	0.471271	0.0834834	0.628337	-0.13827	0.421274	-0.173451	0.311694	-0.0590918	0.732097	-0.0986107	0.567199	-0.0940047	0.585525	-0.101269	0.556744	0.322753	0.0548696	0.273798	0.106125	-0.184288	0.281947	0.0345211	0.841577	-0.160022	0.351195	-0.100055	0.561509
COAD	0.0700873	0.128788	0.0284555	0.537869	0.0406866	0.378307	0.0579529	0.20932	0.0635218	0.168725	0.0208027	0.652479	0.0131894	0.775265	-0.0112752	0.807186	0.0754363	0.10202	0.00135052	0.97668	0.0454356	0.325137	-0.00651564	0.887845	0.0292745	0.526226	0.0951237	0.0390537	-0.0720727	0.11828
DLBC	0.381299	0.00749684	0.0913312	0.536988	0.277998	0.0557277	0.00656761	0.964663	0.312827	0.0303988	0.0214392	0.884998	0.17252	0.24097	0.0122193	0.934305	-0.125802	0.394215	0.405463	0.00424982	0.25579	0.0792983	0.0871226	0.555986	-0.00846992	0.954437	0.16986	0.248412	-0.063901	0.666112
ESCA	-0.102661	0.193607	-0.231696	0.0030106	0.0856563	0.278463	-0.283096	0.000261953	-0.179294	0.0224363	-0.379386	6.39727e-07	-0.0956884	0.225794	-0.25463	0.00107593	-0.0816514	0.301636	-0.145084	0.065463	0.0629971	0.425797	-0.32717	2.14252e-05	-0.20607	0.00851749	-0.303058	8.85427e-05	-0.188275	0.0164271
GBM	-0.116216	0.13357	-0.0106435	0.891087	-0.0901318	0.245282	-0.0261367	0.736646	-0.114154	0.140649	0.00850533	0.912869	0.0451318	0.561305	-0.0894738	0.248759	-0.053692	0.48942	-0.0974495	0.208879	-0.128978	0.0956677	-0.0700662	0.366796	-0.00640281	0.934352	-0.0471406	0.543992	-0.0606624	0.43473
HNSC	0.0577364	0.196545	0.0599283	0.180059	0.0198959	0.656531	0.091621	0.0401695	0.0452644	0.311464	0.0950575	0.0332285	0.10647	0.0170171	0.0509949	0.254098	0.0430318	0.335957	-0.0890546	0.0461203	-0.0640115	0.152117	0.0236992	0.596293	0.0766098	0.0863979	0.0293542	0.511699	0.0173752	0.697752
KICH	0.0751444	0.551897	0.0542429	0.667813	-0.0245745	0.845933	-0.0443957	0.72547	0.103309	0.412824	0	1	-0.063158	0.617205	-0.0688179	0.585954	-0.0258519	0.83803	0.0810794	0.520836	0.0342173	0.786702	0.0146206	0.907974	0.154312	0.219697	0.0274028	0.828456	0.218759	0.0799906
KIRC	0.0372968	0.389261	-0.112105	0.00945617	0.0647913	0.134473	-0.145766	0.000720176	-0.139636	0.0012032	-0.012505	0.772906	-0.0697207	0.107216	0.0848593	0.0497915	-0.0931195	0.0312792	-0.000507737	0.990652	-0.0221658	0.608958	-0.132798	0.00208335	-0.223787	1.68984e-07	-0.12399	0.00407534	-0.0813573	0.0600378
KIRP	-0.0752361	0.202211	-0.094657	0.108317	0.146422	0.0127087	0.0235066	0.690678	-0.0977776	0.0971171	-0.0337429	0.567792	0.196235	0.000795908	-0.205004	0.000452706	0.167415	0.00431874	-0.110744	0.0600709	-0.011303	0.848271	-0.0295792	0.616528	-0.136432	0.0203329	-0.0928409	0.115289	-0.0632758	0.283675
LAML	-0.229549	0.00457869	-0.258141	0.0013736	-0.208626	0.0101495	0.0269178	0.74285	-0.183366	0.024218	-0.0640187	0.434838	0.0926604	0.257801	0.0932813	0.254611	0.0897299	0.273224	-0.0804308	0.326233	-0.235499	0.0036043	0.27811	0.000545118	-0.0974236	0.234028	-0.00868311	0.915729	-0.190956	0.0188411
LGG	-0.37038	1.20761e-18	-0.150912	0.000496314	-0.15975	0.000224899	-0.0644589	0.138717	-0.306058	6.19646e-13	0	1	-0.0835391	0.0548311	-0.0249528	0.566885	-0.103055	0.0177418	0.00300328	0.94506	-0.125551	0.00382449	-0.195532	5.88714e-06	-0.207076	1.55801e-06	-0.180173	3.06831e-05	-0.295812	3.8228e-12
LIHC	0.0324086	0.53209	0.101935	0.0488547	0.0524667	0.311558	0.120698	0.0195477	0.105604	0.0412358	0.22027	1.71982e-05	0.123648	0.016738	0.0127312	0.80615	0.0880493	0.0890564	0.049231	0.342381	0.0487067	0.347553	0.121905	0.018352	0.170771	0.000913492	0.0533607	0.303374	0.0422318	0.415443
LUAD	-0.0116392	0.789997	0.0772992	0.0765164	-0.0459908	0.292417	0.0839517	0.0543267	-0.0306847	0.482533	0.0419718	0.336682	0.05798	0.184275	0.0479019	0.272803	-0.0702085	0.107755	-0.107243	0.0138613	-0.0575703	0.1874	-0.0540661	0.215736	-0.0296758	0.497051	-0.0960559	0.0276041	0.22659	1.49743e-07
LUSC	-0.126229	0.0046597	-0.19943	6.86086e-06	0.0408417	0.361633	-0.198834	7.31728e-06	-0.198542	7.55115e-06	-0.179415	5.37633e-05	-0.191111	1.65689e-05	-0.0651963	0.145062	-0.0759779	0.0893526	-0.0994137	0.026072	-0.0512897	0.251834	-0.213464	1.42318e-06	-0.206718	3.07247e-06	-0.135078	0.00244709	-0.182258	4.06575e-05
MESO	-0.319955	0.00267256	-0.124982	0.251556	-0.00147845	0.989221	-0.0541308	0.620596	-0.32444	0.0023068	0.0368874	0.735975	-0.162512	0.13492	-0.14757	0.175124	-0.219778	0.0420281	0.0985166	0.366826	-0.0543868	0.618942	-0.233596	0.0304164	-0.23184	0.0317223	-0.249372	0.0205886	0.000897189	0.993459
OV	-0.167601	0.00105563	-0.0304416	0.554645	-0.130853	0.0107725	-0.0861458	0.094002	-0.18948	0.000207044	0.0329255	0.522792	-0.0276953	0.590928	0.0626581	0.223608	-0.0623297	0.226049	0.0492929	0.338546	0.0180708	0.725837	-0.198715	9.83171e-05	-0.217742	1.89941e-05	-0.155614	0.00238149	-0.142399	0.00548251
PAAD	0.0347904	0.644776	0.149709	0.0460916	-0.00622911	0.934232	0.129469	0.0849938	0.0817819	0.277816	0.022311	0.767532	0.0966647	0.199285	-0.0836408	0.267002	0.117705	0.11764	-0.0361308	0.632077	0.0326782	0.664997	-0.176607	0.0183642	-0.0811608	0.281494	0.073214	0.331439	0.165731	0.0270454
PCPG	0.0986584	0.183939	0.152041	0.0399133	0.0105358	0.887434	0.113812	0.125015	0.0696055	0.349124	0	1	0.0417173	0.57499	0.103614	0.162767	0.118241	0.110896	0.111855	0.131678	0.165573	0.025093	-0.0325597	0.661707	-0.195123	0.00812144	0.0121469	0.870361	0.149257	0.0437384
PRAD	-0.0458914	0.306258	0.0293706	0.512735	-0.0542732	0.226193	0.00374532	0.93349	-0.0474931	0.289667	-0.0148574	0.740588	-0.014426	0.747861	-0.0337922	0.45134	0.0279504	0.533336	0.0262582	0.558417	0.00737491	0.86947	-0.088447	0.0483052	-0.0351382	0.433509	-0.0586213	0.191097	0.0590036	0.188213
READ	-0.00651467	0.933409	-0.0641931	0.409839	-0.0454908	0.559383	-0.0296874	0.703316	-0.0631947	0.417174	-0.0592418	0.446961	0.0456811	0.557739	-0.081206	0.296831	-0.11666	0.133255	-0.0498958	0.521944	-0.052693	0.498851	0.062412	0.422978	-0.138249	0.0747947	-0.0671361	0.388662	-0.0631546	0.41747
SARC	0.0216802	0.726369	-0.156223	0.0111793	-0.0895203	0.147682	-0.0767481	0.214773	-0.130726	0.0340889	-0.0395318	0.523282	0.00314395	0.95953	-0.0282173	0.648736	-0.0495208	0.423851	0.00894848	0.88516	-0.0731112	0.237365	-0.0769419	0.213614	0.0651826	0.292263	-0.064595	0.296645	-0.167992	0.00631737
SKCM	-0.107848	0.0192226	-0.132535	0.0039589	-0.0596221	0.196474	-0.158258	0.000566365	-0.152071	0.000930223	-0.0711729	0.122956	-0.131897	0.00413818	-0.0881563	0.0558948	-0.162483	0.000399391	-0.0863913	0.0610089	-0.0507688	0.271509	-0.215494	2.35943e-06	-0.0500009	0.278835	-0.144471	0.00166902	-0.0645984	0.161607
STAD	-0.0824753	0.110821	-0.0819662	0.113049	-0.0389958	0.451501	-0.0596363	0.249312	-0.0992527	0.054814	-0.0755024	0.144482	-0.0182909	0.724052	-0.000640759	0.990133	-0.0675209	0.192008	-0.081818	0.113704	-0.00262015	0.959668	-0.133275	0.00977265	0.00321543	0.950516	-0.0926144	0.0732396	-0.0131225	0.800053
TGCT	-0.309196	8.58402e-05	-0.331092	2.4239e-05	0.124556	0.121325	-0.246219	0.00194576	-0.455442	2.31731e-09	-0.199759	0.012413	-0.104735	0.19319	-0.0721261	0.370907	-0.310728	7.88204e-05	0.228046	0.0041937	0.289964	0.000240918	-0.499839	3.07274e-11	0.0437549	0.587569	-0.516093	5.36938e-12	0.206346	0.00975477
THCA	0.13012	0.0032417	0.0690677	0.11928	-0.0120486	0.786055	0.0881989	0.0465022	0.0775938	0.0800055	0.0383007	0.388057	-0.0597099	0.178195	0.230256	1.45664e-07	0.0767458	0.0833688	0.0933424	0.035083	0.0687519	0.120983	0.189775	1.59989e-05	0.0580955	0.19024	0.097392	0.0278598	0.10651	0.0161158
THYM	0.204574	0.0256322	-0.0249317	0.787819	-0.0112188	0.903616	-0.237261	0.00937413	0.145108	0.115353	-0.0163933	0.859545	-0.0331686	0.720264	-0.200898	0.0284668	-0.335714	0.000189603	0.0197625	0.83107	0.0577746	0.532552	-0.0556126	0.548024	-0.268491	0.00315334	0.0764306	0.408708	0.54861	1.05307e-10
UCEC	0.0284873	0.505742	0.0401519	0.34816	0.0178973	0.675916	0.105732	0.0132705	0.0136834	0.749268	0.0798164	0.0618782	0.0847122	0.0474683	0.0670713	0.116816	0.0217531	0.611366	0.0112788	0.792216	0.0191122	0.655291	-0.0568464	0.183922	-0.0140412	0.74294	0.0579951	0.175204	0.0277419	0.516945
UCS	-0.0343859	0.801357	-0.147075	0.279394	-0.18187	0.179753	-0.209901	0.1205	-0.227459	0.0918081	0	1	-0.28347	0.0342521	-0.0857159	0.529919	-0.214226	0.112868	0.0197594	0.88507	-0.0023142	0.986495	-0.337656	0.0109272	0.358179	0.0067185	-0.254123	0.0587654	-0.147435	0.278207
UVM	0.0497824	0.661001	-0.0331431	0.770397	-0.0437293	0.700122	0.108041	0.340116	0.0384185	0.735106	-0.0275284	0.808476	-0.00880928	0.938183	0.013947	0.902275	0.00510606	0.964146	-0.102349	0.366313	-0.00136732	0.990396	0.0358631	0.752137	-0.00333827	0.976555	0.0322622	0.776338	0.0379201	0.738418

[truncated: 7 more sheets: MHC, Immunoinhibitory, Immunostimulator, Immune checkpoint inhibitors, Immune checkpoint stimulator, IC50, Abbreviation]
